1  
2  
3  
4  
5  
6  
7  
8  
9  
10  
11  
12  
13  
14  
15  
16  
17  
18

**Modeling of a negative feedback mechanism explains age-dependent genetic architecture in reproduction in domesticated *C. elegans* strains**

Edward E. Large<sup>1</sup>, Raghavendra Padmanabhan<sup>1</sup>, Kathie L. Watkins<sup>1</sup>, Richard F. Campbell<sup>1</sup>,  
Wen Xu<sup>1</sup>, Patrick T. McGrath<sup>1</sup>

<sup>1</sup>Department of Biology, Georgia Institute of Technology, Atlanta, GA 30332, USA

1 **ABSTRACT**

2 *Most biological traits and common diseases have a strong but complex genetic basis, controlled*  
3 *by large numbers of genetic variants with small contributions to a trait or disease risk. The*  
4 *effect-size of most genetic variants is not absolute, but can depend on a number of factors*  
5 *including the age and genetic background of an organism. In order to understand the*  
6 *mechanisms that cause these changes, we are studying heritable trait differences between two*  
7 *domesticated strains of C. elegans. We previously identified a major effect locus, caused by a*  
8 *mutation in a component of the NURF chromatin remodeling complex, that regulated*  
9 *reproductive output in an age-dependent manner. The effect-size of this locus changes from*  
10 *positive to negative over the course of an animal's reproductive lifespan. Using a previously*  
11 *published macroscale model of egg-laying rate in C. elegans, we show how time-dependent*  
12 *effect-size can be explained by an unequal use of sperm combined with negative feedback*  
13 *between sperm and ovulation rate. We validate a number of key predictions of this model using*  
14 *controlled mating experiments and quantification of oogenesis and sperm use. By incorporating*  
15 *this model into QTL mapping, we identify and partition new QTLs into specific aspects of the*  
16 *egg-laying process. Finally, we show how epistasis between two genetic variants is predicted by*  
17 *this modeling as a consequence of unequal use of sperm. This work demonstrates how*  
18 *modeling of multicellular communication systems can improve our ability to predict and*  
19 *understand the role of genetic variation on a complex phenotype. Negative autoregulatory*  
20 *feedback loops, common in transcriptional regulation, could play an important role in modifying*  
21 *genetic architecture in other traits.*

22

## 1 AUTHOR SUMMARY

2 Complex traits are influenced not only by the individual effects of genetic variants, but also how  
3 these variants interact with the environment, age, and each other. While complex genetic  
4 architectures seem to be ubiquitous in natural traits, little is known about the mechanisms that  
5 cause them. Here we identify an example of age-dependent genetic architecture controlling the  
6 rate and timing of reproduction in the hermaphroditic nematode *C. elegans*. Using  
7 computational modeling, we demonstrate how this age-dependent genetic architecture can arise  
8 as a consequence of two factors: hormonal feedback on oocytes mediated by major sperm  
9 protein (MSP) released by sperm stored in the spermatheca and life history differences in sperm  
10 use caused by genetic variants. Our work also suggests how age-dependent epistasis can  
11 emerge from multicellular feedback systems.

## 12 INTRODUCTION

13 Most biological traits have a strong heritable, or genetic, component. There is general interest to  
14 understand the genetic basis of these traits, often by identifying the quantitative trait nucleotides  
15 (QTNs) that underlie heritable variation segregating within a population. Two decades of studies  
16 of biological traits in humans and other model organisms has made it clear that the genetic  
17 basis controlling most biological traits is incredibly complex – not only are dozens to hundreds  
18 genes involved, but non-linear effects are also at play. While the role of statistical epistasis, or  
19 the deviation from a linear model in a sampled population, is debated (1), work in model  
20 organisms have demonstrated that genetic epistasis (2) (also called biological epistasis (3) or  
21 compositional epistasis (4)) between two loci is ubiquitous, observed in fungi (5-7), plants (8-  
22 11), insects (12, 13), nematodes (14, 15), birds (16, 17), and mammals (18-21). Environment  
23 and age are also relevant covariates, influencing the effect and onset of the QTN on the  
24 phenotype. A recent survey of natural variation in gene expression in *C. elegans* identified >  
25 900 eQTLs with time-dependent dynamics (22). While identification of QTNs remains a  
26 worthwhile and necessary goal, development of novel approaches that can integrate and  
27 simplify how large numbers of genetic variants modify phenotypic divergence represents a  
28 necessary accomplishment for the field.

29 GWAS and QTL mapping, two common quantitative genetics techniques, are usually unable to  
30 identify interacting genetic variants. GWAS, which can narrow down causative genetic variants  
31 to small regions, are typically underpowered to identify statistically significant epistatic  
32 interactions due to low natural allele frequencies and the large number of statistical tests that  
33 must be performed (23). QTL mapping, on the other hand, has increased power to identify

1 interacting QTLs due to equal allele frequencies but identifies large regions in linkage  
2 disequilibrium containing thousands of potential variants (24). Due to this inherent difficulty in  
3 studying epistasis that occurs between genetic variants that segregate within a population,  
4 studies of epistasis have typically focused on laboratory induced loss-of-function mutations  
5 through mutagenesis or RNAi. It is unknown whether the mechanisms that cause epistasis in  
6 these approaches will apply in natural populations.

7 As a more tractable model to understand how genetic variants impact a trait, we are focusing  
8 our studies on two *C. elegans* strains, N2 and LSJ2, derived from an individual hermaphrodite  
9 isolated in 1951. Due to a reproductive system that primarily relies on self-fertilization, the  
10 population these two strains derived from was genetically identical, at which point they were  
11 separated into distinct cultures of either solid or liquid media sometime between 1957 and 1958  
12 (Figure 1A) (25) and allowed to diverge. N2 was cultured for ~15 years on agar plates while  
13 LSJ2 was cultured for ~50 years in liquid culture. Using next-generation sequencing, we  
14 identified 94 new mutations that were fixed in the N2 lineage and 188 new mutations were fixed  
15 in the LSJ2 lineage (26). Despite this low-level of genetic diversity, a large number of  
16 phenotypic differences distinguish the two strains. A total of five QTNs have been identified in  
17 these strains, providing empirical evidence linking variation in a neuropeptide receptor activity to  
18 changes in social behavior (27), variation in sensory gene deployment with specific  
19 chemosensory responses (25, 26, 28), variation in chromatin remodeling with life history  
20 tradeoffs decisions (29), and variation in an acetyltransferase as the source of cryptic genetic  
21 variation affecting organ development (30). To date, however, these studies have focused on  
22 QTNs for large-effect QTLs and have largely ignored the role of multigenic changes.

23 To address this deficiency, we studied the genetic basis of reproductive differences between the  
24 N2 and LSJ2 strains at five different time points spanning their reproductive lifespan. Our goal  
25 for this study was to identify examples of complex genetic architecture and understand their  
26 molecular and cellular causes.

## 27 RESULTS

### 28 A major effect QTL surrounding *nurf-1* has an age-dependent effect size

29 We previously performed QTL mapping on reproductive rate using 94 recombinant inbred  
30 strains (RILs) generated between LSJ2 and CX12311 (29). CX12311 is a strain that derives the  
31 majority (>99%) of its DNA from N2 with the exception of a small amount of DNA backcrossed  
32 from the CB4856 wild strain that surrounds the *npr-1* and *glb-5* genes (Figure 1B) (26). Novel

1 mutations in these two genes became fixed in the N2 lineage and result in pleiotropic effects on  
2 a large number of phenotypes. Use of the CX12311 strain allows us to avoid studying their  
3 effects. To study the role age plays on reproduction, we chose five time points that spanned the  
4 reproductive lifespan of the CX12311 animals. Egg-laying rate was quantified by counting the  
5 number of eggs laid by six animals for six hours on agar plates seeded with *E. coli* bacteria  
6 (**Figure 1C**). We previously identified a major effect QTL centered over the *nurf-1* gene that  
7 accounted for ~50% of the observed phenotypic variation (26). To study how the animal's age  
8 affected the effect-size of this locus, we first segregated the 94 RIL strains based upon their  
9 genotype at *nurf-1* (**Figure 1D – top panel**). At the first three time points, RIL strains with the  
10 N2 genotype laid more eggs than RIL strains with the LSJ2 genotype, however, at the fourth  
11 and fifth time point, this relationship flipped - animals with the LSJ2 allele of *nurf-1* laid more  
12 eggs than animals with the N2 allele. To visualize this effect more clearly, we also plotted the  
13 effect-size of the *nurf-1* locus at all five time points (**Figure 1D – bottom panel**) by subtracting  
14 the egg-laying rate of the strains with each genotype. The effect-size of the LSJ2 allele of *nurf-1*  
15 was negative for the first three time points and positive for the last two time points. This is a  
16 clear example of age-dependence, i.e. the prediction of the effect of the *nurf-1* locus on the egg-  
17 laying rate requires knowledge of both the *nurf-1* genotype as well as the current animal's age.

18 To verify these observations, we next assayed a near isogenic line (NIL) constructed by  
19 backcrossing the region surrounding *nurf-1* from LSJ2 into the CX12311 strain (**Figure 1B**)  
20 along with the CX12311 and LSJ2 parental strains. The CX12311 strain (containing the N2  
21 allele of the *nurf-1* locus) laid more eggs than the NIL<sub>*nurf-1*</sub> strain for the first three time points but  
22 fewer eggs at the fourth and fifth time points, again resulting in a time-dependent effect size that  
23 flips from positive to negative (**Figure 1E – top and bottom panel**). The effect size of *nurf-1*  
24 calculated using both the RIL and NIL strains and showed good qualitative agreement (**Figure**  
25 **1D and 1E – bottom panel**). Due to additional segregating variants in the RIL strains, we do  
26 not expect these two calculations to be identical. In both experimental designs, the crossing of  
27 the two lines was due to a decrease in the egg-laying rate in the strain containing N2 *nurf-1* as  
28 opposed to an increase in egg-laying of the LSJ2 *nurf-1* strains. The LSJ2 strain was statistically  
29 indistinguishable at the first three time points from the NIL strain. However, at the last two time  
30 points, LSJ2 laid additional eggs resulting in a larger effect-size at these two points. These  
31 results demonstrate that the *nurf-1* locus can have both positive and negative effects on egg-  
32 laying in a manner correlated with the animal's age.

## 1 **Difference in early egg-laying rate caused by differences in germline stem cell** 2 **production, oocyte maturation and/or rate of fertilization**

3 The rate that eggs are laid on an agar plate is dependent on a large number of factors: size and  
4 rate of mitosis of a germline progenitor pool, speed of meiosis/differentiation of these cells,  
5 maturation and growth of oocytes, ovulation and fertilization of the primary oocyte to produce an  
6 egg, and finally the rate of active expulsion of an egg through a controlled motor program that  
7 results in the opening of the vulva (**Figure 2A**). To characterize which factor might be affected  
8 by *nurf-1*, we first characterized the number of fertilized eggs in each strain using DIC  
9 microscopy. If the rate fertilized eggs were laid was affected in LSJ2 and NIL<sub>*nurf-1*</sub> strains but the  
10 rate of production of fertilized eggs remained the same, we would expect LSJ2 and NIL<sub>*nurf-1*</sub> to  
11 contain more eggs in their uterus than the CX12311 strain. We measured the number of  
12 fertilized eggs in each of these three strains at 24 and 48 hours after the L4 stage (**Figure 2B**).  
13 In contrast to this prediction, we found that both LSJ2 and NIL<sub>*nurf-1*</sub> had significantly less fertilized  
14 eggs than the CX12311 strain. We conclude that production of fertilized eggs must be affected  
15 in the LSJ2 and NIL<sub>*nurf-1*</sub> strain. The lower number of unlaied fertilized eggs in these strains is  
16 potentially a consequence of the reduced rate of production of fertilized eggs.

17 We next measured the number of large oocytes undergoing oogenesis in these three strains  
18 (region marked oogenesis in **Figure 2A**). We hoped to distinguish between two possible  
19 mechanisms modifying the rate of production of fertilized eggs: 1) the rate of production of  
20 mature oocytes was decreased in LSJ2/NIL<sub>*nurf-1*</sub> strains or 2) the rate of fertilization of a mature  
21 oocyte was decreased in the LSJ2/NIL<sub>*nurf-1*</sub> strains. We reasoned that in the former case, the  
22 number of large oocytes undergoing oogenesis would be lower in LSJ2 and NIL<sub>*nurf-1*</sub> due to the  
23 decrease in production. In the latter case, if oocyte production was unaffected but the rate they  
24 were fertilized was lowered, we reasoned that the number of mature, large oocytes would  
25 increase over time. However, when we measured the number of large oocytes in each strain at  
26 24 and 48 hours, we found no statistically significant difference between any of the three strains  
27 (**Figure 2C**). We believe this likely indicates the presence of a homeostatic mechanism that  
28 keeps the number of oocytes undergoing maturation constant, despite a difference in how often  
29 they are created or fertilized.

30 Finally, we measured the rate that progenitor germline stem produce new cells through mitosis,  
31 as these cells provide the source of meiotic cells that later differentiate into oocytes (marked as  
32 mitotic zone in **Figure 2A**). There is not a one-to-one relationship between the rate of mitosis  
33 and oocyte production due to cannibalization of a subset of these cells, but it is thought that

1 there is a relationship between the size of the progenitor pool and subsequent rate of  
2 reproduction (31). Progenitor cells can be distinguished from cells in the transition zone based  
3 upon nuclear morphology. We observed a significant difference between CX12311 and NIL<sub>nurf-1</sub>  
4 at the 24 hour time point in the number of progenitor cells, suggesting that the difference in egg-  
5 laying rate could be caused by this difference (Figure 2D). However, the NIL<sub>nurf-1</sub> strain was also  
6 significantly different from LSJ2 at this time point. This difference disappeared at the 48 hour  
7 time point, when each strain had a very similar average number of progenitor cells. We also  
8 measured the number of cells undergoing mitosis in the progenitor cells, in case there was also  
9 a difference in the ratio of cells dividing in the progenitor zone. We used an antibody to Ser10  
10 phosphorylation in histone H3, which is correlated with chromosome condensation in mitosis  
11 (Figure 2E) (32, 33). We observed very similar results to the germline progenitor pool  
12 suggesting the ratio of progenitor cells undergoing mitosis was the same in all three strains. The  
13 NIL<sub>nurf-1</sub> was different from both parental strains at the 24 hour time point, and all three strains  
14 were indistinguishable from each other at the 48 hours. We conclude from these observations  
15 that *nurf-1* likely has a modulatory role on the rate of early proliferation of the germline and LSJ2  
16 contains additional genetic variations that can suppress this effect. While this difference in  
17 proliferation could account for some of the differences in egg-laying rate, we don't believe it can  
18 explain the entire change as this would indicate different mechanisms are at play between LSJ2  
19 and NIL<sub>nurf-1</sub>.

## 20 **A macroscale model of egg-laying can predict the age-dependent effect of the *nurf-1*** 21 **locus**

22 While age-dependent QTLs have been identified through genetic mapping approaches, few  
23 mechanisms have been demonstrated or even proposed to understand how animal's age could  
24 influence the effect of a genetic variant. To explore possible mechanisms that could cause age-  
25 dependence for *nurf-1*, we leveraged the existing literature on genes controlling egg-laying in *C.*  
26 *elegans*. One recently described mechanism describes how sperm regulates the rate of egg-  
27 laying rate. *C. elegans* hermaphrodites produce a limited number of sperm (~300) that are  
28 stored in an organ known as the spermatheca before oogenesis begins (34). Sperm release a  
29 hormone called major sperm protein (MSP) that stimulates maturation and ovulation of the  
30 primary oocyte through ephrin-receptor signaling (Figure 3A) on the oocyte and the gonadal  
31 sheath cell (35, 36). The effect of MSP is dose-dependent, so that as the number of sperm  
32 stored in the spermatheca decreases (through fertilization), ovulation and oocyte maturation  
33 also will decrease (35, 36). This suggests a possible mechanism tying an animal's age to its

1 egg-laying rate. As an animal ages, each egg it creates through fertilization reduces the number  
2 of sperm by one. Animals with N2 *nurf-1* lay more eggs during the first three time points  
3 compared to LSJ2 *nurf-1* animals and will consequently have fewer sperm at the fourth and fifth  
4 time point. This reduction in sperm will lower sperm hormone present at the primary oocyte,  
5 which counterbalances the positive effect of the N2 *nurf-1* allele on egg-laying during the  
6 transition from between the third and fourth timepoint.

7 We tested this hypothesis more formally using a previously published macroscale model (37),  
8 which stipulates the egg-laying rate is proportional to the product of the number of oocytes with  
9 the number of sperm (**Figure 3B**). This model is defined by four time-independent parameters:  
10  $k_o$ , which specifies how rapidly oocytes are created,  $k_c$ , which specifies a carrying capacity of  
11 the gonad,  $k_f$ , which defines the fertilization rate, and  $S_0$ , which specifies the number of self-  
12 sperm created by the animal. In this report, we excluded the  $k_c$  parameter, as we found that the  
13 carrying capacity of all three strains was similar (**Figure 2C**), and our attempts to fit this  
14 parameter resulted in negative, non-physiological values. Also, due to the nature of the  
15 equations, the  $k_f$  and  $k_o$  parameters end up having a very similar effect on egg-laying rate. To  
16 prevent the noise caused by their tight correlation, we fit a single  $k_f$  value to be used for all of the  
17 strains. This  $k_o$  value does not distinguish between the number of molecular and cellular  
18 processes described above that influence how fast mature oocytes are produced. We fit  
19 individual  $k_o$  and  $S_0$  parameters to each of the replicates in Figure 1E (**Figure 3C**). This model  
20 could recapitulate the rise and fall of the egg-laying rate – the rate rose as oocytes were  
21 generated and fell as number of sperm decreased (**Figure 3D – top panel**). A significant  
22 increase in  $S_0$  was observed in the LSJ2 strain compared to the CX12311 and NIL<sub>*nurf-1*</sub> strain  
23 (**Figure 3C – top panel**). This is in good qualitative agreement with our previous demonstration  
24 that LSJ2 animals lay more eggs over the course of their lifetime than CX12311 (29). However,  
25 the quantitative agreement was rather poor for the LSJ2 strain. While the predicted  $S_0$  value of  
26 CX12311 was in good agreement with our previously measured fecundity (263 vs. 256), the  
27 predicted value of  $S_0$  was significantly higher than the measured fecundity (434 vs. 319). This is  
28 most likely due to the inability of the model to fully account for the genetic changes in the LSJ2  
29 strain. The average residuals for the LSJ2 strain were significantly higher than CX12311 (2.0 vs.  
30 0.72). The fitted  $k_o$  parameters matched our expectations - CX12311 had a higher  $k_o$  value than  
31 either the LSJ2 or NIL<sub>*nurf-1*</sub> strain (**Figure 3C - bottom panel**). The effect-size calculated from  
32 the modeling experiments (**Figure 3D – bottom panel**) also qualitatively matched the effect  
33 size we experimentally measured (**Figure 1E – bottom panel**).



1 This analysis showed that a constant change to oocyte generation rate could have a time-  
2 dependent effect on egg-laying resulting in sign-switching at later time points. Our model  
3 explicitly predicts that the reduction in CX12311 animals in egg-laying rate at later time points is  
4 not due to changes in reproductive capacity but rather decreases in sperm number. To test this  
5 prediction, we first measured the number of fertilized eggs and large oocytes in CX12311  
6 animals at 66 hours (**Figure 4A**). In line with our expectations, we observed a reduction in the  
7 number of fertilized eggs (~10) contained in the CX12311 animals compared to earlier time  
8 points (**Figure 2B**). This indicates that the decrease in egg-laying rate cannot be explained by  
9 reduction of in the rate of laying fertilized eggs in the uterus. We also observed a large number  
10 of large oocytes (~22) in CX12311 animals, an increase over the previous two time points  
11 (**Figure 4A and 2C**). This suggests that the change in egg-laying rate is not due to changes in  
12 oocyte maturation rate, as mature oocytes are available for fertilization. These observations are  
13 consistent with our hypothesis that decreased sperm and MSP at later timepoints are  
14 responsible for the decreased rates of egg-laying in CX12311.

15 Our modeling predicts that the CX12311 strain will have fewer sperm later on in life due to their  
16 increase rate of fertilization at earlier time points (**Figure 4B**). We counted the number of sperm  
17 cells present in the spermatheca in CX12311 and NIL<sub>nurf-1</sub> animals using DAPI staining  
18 combined with fluorescence microscopy. At both 48 and 66 hours, an increased number of  
19 sperm were present in the NIL<sub>nurf-1</sub> animals compared to CX12311 in a manner consistent with  
20 the modeling.

21 As a final method to test this model, we took advantage of *C. elegans*' androdioecious mating  
22 system to increase the sperm available to the hermaphrodites at later time points by mating  
23 CX12311 and NIL<sub>nurf-1</sub> hermaphroties to CX12311 males, which result in the transfer of ~1000  
24 sperm to the hermaphrotite. After mating young adult animals, we separated the  
25 hermaphrodites from males and measured the egg-laying rate at two time points late in life.  
26 Consistent with our predictions, increasing sperm number prevented the sign-switching from  
27 occurring at both of these times in unmated animals (**Figure 4D**). This indicates that decreases  
28 in sperm number are the primary reason for decreases in egg-laying rate at late time points.

### 29 **Identification of modifier QTLs that also effect the egg-laying process**

30 We next investigated whether additional QTLs affected egg-laying rate differences between  
31 LSJ2 and CX12311. The presence of a major effect QTL (such as the *nurf-1* locus) can mask  
32 the effects of smaller QTLs so we performed additional scans using the genotype of *nurf-1* as  
33 an additive or interacting covariate (**Figure 5A**) (38). We identified five QTLs that were

1 significant at the genome-wide level: one QTL on the center of chromosome I, one QTL on the  
2 center of II, one large QTL on the center and right arm of chromosome IV, one QTL on the right  
3 arm of V, and one QTL in the center of X (**Figure S1 – S5**). The identification of the QTL on  
4 chromosome I was expected, as it contains a previously described missense mutation in *nath-*  
5 *10* that was shown to affect egg-laying ([30](#)). However, the other four QTLs do not contain any  
6 genetic variants that are known to affect egg-laying.

7 In order to analyze how these additional five modifier QTLs regulated the egg-laying rate at the  
8 five mapping time points, we segregated the 94 RIL lines based upon their *nurf-1* and modifier  
9 QTL genotype (**Figure 5B**). By segregating both genotypes, we could visually determine if any  
10 non-linear interactions (i.e. epistasis) existed between *nurf-1* and the five modifier loci. Additive  
11 interactions would result in two lines with identical slopes while non-linear interactions result in  
12 lines with different slopes. Visual inspection of these effect-size graphs indicated that both  
13 additive and non-linear effects were present. In order to formalize this analysis, we used  
14 ANOVA to determine (i) if the modifier QTL had a significant effect at the particular timepoint, (ii)  
15 whether there was a significant interaction term between *nurf-1* and the modifier variant, and (iii)  
16 the total amount of variance that the modifier QTL explained at that particular timepoint (**Figure**  
17 **5B**). We considered two types of epistasis, positive and negative. Positive epistasis is defined  
18 as when the modifier variant has the same direction of effect in both *nurf-1* genotypes (e.g. the  
19 slope is positive for both lines but different magnitude). Negative epistasis is defined when the  
20 modifier variant has a different direction of effect in the different *nurf-1* genotypes (e.g. one  
21 slope is positive and the other slope is negative). This analysis indicated that the effect of these  
22 modifier QTLs were also complex. Each QTL was age dependent and showed non-linear  
23 interactions with the *nurf-1* locus. This mapping suggests that the egg-laying differences  
24 between N2 and LSJ2 are multigenic, involve extensive epistatic interactions, and are highly  
25 age-dependent.

### 26 **Modeling also predicts age-dependent epistasis at latter timepoints**

27 Further inspection of the age-dependence and epistasis of the modifier QTLs with *nurf-1*  
28 revealed a number of interesting trends (**Figure 5B**). Epistasis was most likely to occur at the  
29 first and last two time points (7 out of 8 significant effects) and less likely to be observed at the  
30 second and third time point (1 out of 7 significant effects). While statistically significant, it is  
31 difficult to interpret epistasis and the first and last time point, as the rate of egg-laying converges  
32 on zero in some of these genetic backgrounds. We were more intrigued by the negative  
33 epistasis observed in three of the modifier QTLs at the 60 - 66 hour time point. This is the time

1 point where we observed effect-size switching for *nurf-1* and we wondered whether the two  
2 features could be related. We decided to use additional modeling to determine if epistasis could  
3 arise through unequal use of sperm. We modeled a modifier QTL by assuming it changed the  
4 oocyte generation rate ( $k_o$ ) in an additive fashion (**Figure S6A**) and calculated the egg-laying  
5 rate predicted by this model for the four possible genotype combinations (*nurf-1* and the  
6 modifier QTL) (**Figure S6B**). These values were plotted at three time points in a similar manner  
7 as **Figure 5B** (**Figure S6C**).

8 This analysis demonstrated the potential role for a modifier QTLs to create negative epistasis,  
9 specifically at a time when we observe negative epistasis in our QTL mapping data. How does  
10 negative epistasis arise? The reason for this can be deduced from our previous observation that  
11 the effect size of the modifier QTL will switch signs due to unequal use of sperm in the two  
12 genetic backgrounds. However, the exact time this occurs is also dependent on the genetic  
13 background of the *nurf-1* locus. The period of time in between these two intersections is when  
14 negative epistasis is observed as the modifier has a positive effect in one *nurf-1* background but  
15 has switched to the negative effect in the other *nurf-1* background. After the sign-switching  
16 occurs for both genotypes, the modifier allele again has the same direction of effect in both *nurf-*  
17 *1* backgrounds. We refer to this time window as the sign epistasis zone (**Figure S6B**).

### 18 **Segregating the effects of the modifier QTLs onto $k_o$ and $S_o$**

19 Finally, we decided to test whether we could use the macroscale modelling of the egg-laying  
20 process to improve our QTL mapping. Instead of performing QTL mapping on each of the five  
21 time points, we used this data to estimate a  $k_o$  and  $S_o$  for each RIL strain (assuming as before  
22 that  $k_c = 0$  and  $k_f$  was the same for all RIL strains). The distribution of these fitted parameters  
23 are plotted in **Figure 6A and 6B**. We next performed QTL mapping to identify genetic regions  
24 that influence these rates. As expected, we identified a number of loci that we found from  
25 previous analysis. The QTL surrounding *nurf-1* was identified as a regulator of both the oocyte  
26 generation rate ( $k_o$ ) and the number of self-sperm ( $S_o$ ). The modifier QTLs on II and X regulated  
27 the oocyte generation rate but not the number of sperm number, while the QTL on V had an  
28 effect on sperm number but not the oocyte generation rate. Interestingly, this analysis also  
29 identified a new QTL on chromosome III as a regulator of sperm number (**Figure 6B**),  
30 suggesting that modeling of the egg-laying process not only helps us understand the modifier  
31 QTLs effect but also can help identify new QTL loci.

32 In order to test these results, we utilized a NIL strain surrounding the QTL on V. We crossed the  
33 NIL<sub>V</sub> strain to the NIL<sub>*nurf-1*</sub> strain to create the double NIL<sub>*nurf-1*;V</sub> strain (**Figure 6D**). This

1 combination of strains allowed us to test the effect of the modifier QTL in both *nurf-1* genotypes.  
2 For each of these strains, we measured the total amount of progeny produced. These NIL  
3 strains showed that the QTL<sub>V</sub> increased the brood size in both *nurf-1* backgrounds, but had a  
4 larger effect size in the LSJ2 *nurf-1* genotype (60 vs. 30) indicating epistasis does exist between  
5 these two loci. This qualitatively agrees with the QTL mapping data (**Figure 6B – right panel**)  
6 but discrepancies were observed between the magnitude of the total brood sizes, suggesting  
7 additional improvements to the model might be beneficial.

## 8 **DISCUSSION**

9 Our results identified four new genetic loci that regulate reproductive rate and/or fecundity that  
10 arose and fixed following separation of the N2 and LSJ2 lineages. Polygenic traits are common  
11 in natural populations, but it was still surprising how rapidly a polygenic trait could evolve in  
12 laboratory conditions. Based upon minimum generation time, we estimate a maximum of 3900  
13 generations separate the LSJ2 and N2 strains. We previously identified one of the causative  
14 genetic variants as a 60 bp deletion in *nurf-1*, which encodes a component of the NURF  
15 chromatin remodeling factor (29). This deletion arose and fixed in the LSJ2 lineage. Using  
16 competition experiments, we demonstrated this genetic variant was advantageous in the LSJ2  
17 growth conditions, suggesting it was fixed by selection. The additional modifier variants could  
18 also be advantageous, which could explain their rapid fixation. However, due to the populations  
19 small effective population size and limited outcrossing, genetic draft and genetic drift are also  
20 relevant evolutionary forces for these strains. Additional work identifying the exact causative  
21 genetic variant will be necessary to determine the lineage it arose within and its fitness in the  
22 relevant conditions to determine if its fixation was caused by selection vs. genetic drift or draft.  
23 Unfortunately, these experiments are not trivial. Despite the inherent advantages to the system  
24 as compared to wild strains, each QTL contains a handful to dozens of potential causative  
25 genetic variants. The small effect-size of these variants also requires a large number of animals  
26 to be tested to obtain the statistical power to distinguish between strains with and without the  
27 variant. High-throughput and automated analysis of reproductive output would greatly aid this  
28 work.

29 The study of natural traits from a number of phyla has found a number of examples of biological  
30 epistasis (7, 12, 14, 39). Age can also act as an important covariate for genetic variation. The  
31 presence of epistasis and age-dependence can obscure the mapping between genotype and  
32 phenotype as the effect of causative genetic variants can wash out if mapping populations are  
33 not segregated appropriately by age or genetic background. Our results provide a framework to

1 understand how age-dependence can also arise through emergent properties of a cellular  
2 network, which we believe to be the major scientific contribution of this work. Our work indicates  
3 that the complex seesaw of effects that *nurf-1* has on reproductive output can be explained  
4 using two major considerations: (1) a hormonally-mediated negative feedback loop linking  
5 sperm with oocyte maturation, and (2) the effect *nurf-1* has on the rate of oogenesis.  
6 Consequently, the molecular details of how *nurf-1* modifies protein and cellular function are  
7 unnecessary to explain its age-dependence. Our modeling experiments also demonstrated how  
8 sign epistasis could arise in an age-dependent manner strictly through age-independent  
9 changes in the oocyte production rate. The origin of genetic epistasis is often thought of in terms  
10 of biochemical properties of proteins, through physical interactions between two proteins, or  
11 through multiple changes to a parallel or linear signaling pathway (40-42). However, these  
12 mechanisms were typically identified through analysis of mutations or genetic perturbations  
13 generated in the laboratory that have a strong negative effect on fitness. It is interesting to us  
14 that such mechanisms don't seem to be at play here. This is the second example we have  
15 identified in *C. elegans* of what we refer to as cellular epistasis (43) – i.e. the non-linear  
16 interactions are an emergent property of the functions of cellular networks as opposed to  
17 properties of molecular or biophysical interactions between proteins. It will be interesting to see  
18 how often cellular epistasis is responsible for genetic epistasis in natural traits.

19 While the *C. elegans* reproductive system is a special case, any negative feedback loops acting  
20 on a measurable trait could cause similar age-dependent changes. For example, negative  
21 autoregulatory feedback loops are common in transcription factors networks. Any genetic  
22 variants (either *cis* or *trans*) that increase the rate of transcription of one of these transcription  
23 factors will initially appear to have a positive effect-size on the mRNA levels of that gene.  
24 However, as the amount of protein product increases, the transcription factor will turn off the  
25 expression of its own mRNA. Since the amount of protein product will be higher in the strain  
26 with the higher initial expression, the transcription will turn off sooner in that strain, and the  
27 genetic variant will soon appear to have a negative effect on expression.

28 Our work provides an example of how multidisciplinary studies can be used tackle the genetic  
29 basis of complex traits – we leveraged quantitative genetics, detailed knowledge of the egg-  
30 laying process in *C. elegans*, and an existing macroscale model of egg-laying to make our  
31 conclusions.

32

## 1 **Acknowledgements**

2 We thank the *Caenorhabditis* Genetics Center, Christian Frokjaer-Jensen, and Erik Jorgensen  
3 for strains; Erik Andersen, Joshua Weitz, and Greg Gibson for discussions; and Cori Bargmann,  
4 Greg Gibson, Todd Streelman, Hang Lu, and Andres Bendesky for helpful comments on the  
5 manuscript. This work was supported by NIH grants R21AG050304, R01GM114170, and the  
6 Ellison Medical Foundation (to P.T.M.).

## 8 **Author Contributions**

9 E. E. L. and P.T.M. designed and interpreted experiments and wrote the paper. E. E. L.  
10 performed all egg-laying experiments and generated all NILs. E.E.L., R.P. and P.T.M.  
11 performed all QTL mapping. R.P and P.T.M. performed all modeling experiments. K.L.W  
12 performed all fertilized egg counts, large oocyte counts and sperm counts. K.L.W. and R.F.C.  
13 performed all mitotic cell counts. W.X. created *nurf-1* CRISPR-Cas9 strains. R.A.B. provided  
14 synthetic ascarosides.

## 16 **Competing Financial Interests**

17 The authors declare no competing financial interests.

## 19 **Figure Legends**

20 **Figure 1.** A major-effect QTL has an age-dependent effect on egg-laying **A.** History of two  
21 laboratory strains of *C. elegans* (N2 and LSJ2) following isolation of a single hermaphrodite  
22 individual from mushroom compost collected in Bristol, England in 1951. LSJ2 was grown in  
23 liquid, axenic culture whereas N2 was propagated on agar plates. **B.** Schematic of CX12311  
24 and NIL<sub>*nurf-1*</sub> strains. CB4856 is a wild strain isolated from Hawaii. N2 contains two fixed  
25 mutations in the *npr-1* and *glb-5* genes. To avoid studying their effects, we backcrossed the  
26 ancestral alleles of these genes from CB4856 into the N2 strain. NIL<sub>*nurf-1*</sub> contains a small region  
27 surrounding *nurf-1* backcrossed from LSJ2 into CX12311. **C.** Schematic of the experiments  
28 used to characterize the egg-laying rate at five time points.  $t = 0$  was defined as the start of the  
29 L4 stage. **D. Top panel.** All egg-laying rate data of 94 RIL strains created between the CX12311  
30 and LSJ2 strains. Animals were partitioned based upon their *nurf-1* genotype (blue = N2; red =  
31 LSJ2). Small difference in x-axis values for the two backgrounds are for illustration purposes  
32 only and do not indicate any difference in when the egg-laying rate was measured. Overlaid is a  
33 boxplot showing the quartiles of the data (the box) with the whiskers extended to show the rest  
34 of the distribution except for points that are determined to be outliers. All scatterplots and

1 boxplots in the subsequent figures were calculated in the same way. For all figures, ns  $p > 0.05$ ,  
2 \*  $p < 0.05$ , \*\*  $p < 0.01$ , \*\*\*  $p < 0.001$  by Mann-Whitney U test with Bonferroni correction. **Bottom**  
3 **panel.** Effect size of the *nurf-1* locus measured from the RIL strains. **E. Top panel.** Egg-laying  
4 rate of CX12311, LSJ2, and NIL<sub>*nurf-1*</sub> strain measured at five time points. For just this figure, only  
5 non-significant differences are shown. All other comparisons are significant at  $p < 0.05$ . **Bottom**  
6 **panel.** Effect size of the *nurf-1* locus measured from the NIL and parental strains.

7 **Figure 2.** Analysis of components of egg-laying. **A.** Schematic of the *C. elegans* gonad.  
8 Germline Stem Cells (not shown due to their large number) self-renew in the mitotic zone. As  
9 they migrate away from the stem cell niche, they undergo meiosis and differentiate into mature  
10 oocytes. Ovulation forces the primary oocyte into the spermatheca, which stores previously  
11 produced self-sperm, where it is fertilized and develops an eggshell. Fertilized eggs develop in  
12 the uterus until they are laid through the vulva. Only one of two gonads is shown. **B.** Number of  
13 fertilized eggs in the uterus as determined by DIC microscopy. **C.** Number of large oocytes as  
14 determined by DAPI staining and fluorescent microscopy. **D.** Number of germline progenitor  
15 cells. **E.** Number of cells undergoing mitosis in the mitotic zone, as determined by  
16 immunofluorescence to a post-translational modification (H3S10P) in Histone 3 that is  
17 correlated with chromatin condensation in mitosis.

18 **Figure 3.** Macroscopic modeling of the effect of the *nurf-1* locus on egg-laying. **A.** Illustration of  
19 negative feedback in the egg-laying process in *C. elegans*. A limited number of sperm (200 -  
20 350) are initially created and stored in the spermatheca before the gonad switches to  
21 exclusively produce oocytes. Sperm release a hormone called MSP, which induces oocytes to  
22 ovulate and enter the spermatheca where they are fertilized and exit into the uterus to be laid.  
23 **B.** Published macroscopic model of the egg-laying process. Ordinary differential equations  
24 (ODEs) describing the relationship between fertilized eggs (E), sperm (S), and oocytes (O) while  
25 initial conditions are given on the left. A prime (') indicates a time derivative. **C.** Fit of the model  
26 from figure 2B to the data plotted in figure 1E using a common value of the  $k_f$  parameter for all  
27 samples (0.00026). Top value shows best fit values for  $S_0$ . Bottom panel shows best fit values  
28 for  $k_o$ . **D.** Predicted egg-laying rate and effect-size calculated for CX12311, LSJ2, and NIL<sub>*nurf-1*</sub>  
29 strains using the average value of the parameters plotted in figure 2C. This model is able to  
30 account for the rise and fall of egg-laying rate and the change in effect-size over time.

31 **Figure 4.** Reduction in egg-laying rate at later time points caused by use of self-sperm. **A.**  
32 Number of fertilized eggs and large oocytes at the 66 hour time point as determined by DIC  
33 microscopy and DAPI staining. This analysis indicates that CX12311, which shows a drop in

1 egg-laying rate at this time point, is not retaining fertilized eggs in the uterus nor displaying a  
2 loss in oocytes. **B.** Modeling (identical to Figure 3) of the remaining number of self-sperm  
3 predicts that CX12311 will have fewer self-sperm than NIL<sub>nurf-1</sub> at later points in life. **C.**  
4 Measurement of the remaining number of sperm in CX12311 and NIL<sub>nurf-1</sub> as determined by  
5 DAPI staining and fluorescence microscopy. These results are consistent with the predictions  
6 from panel B. **D.** Egg-laying rate of CX12311 and NIL<sub>nurf-1</sub> hermaphrodites mated or unmated to  
7 CX12311 males. Mating increases the number of sperm stored in the spermatheca. These  
8 results indicate that the sign-switching observed in unmated animals (48 hours) can be reversed  
9 by the addition of sperm. The decrease in egg-laying rate in both strains at later timepoints (88  
10 hours) can also be reversed by addition of sperm.

11 **Figure 5.** Additional modifier QTLs affect egg-laying in an age-dependent manner. **A.** QTL  
12 mapping using the *nurf-1* genotype as an additive (black) or interactive (blue) covariate. Black  
13 and blue stars indicate the five QTLs with genome-wide significance above 0.05. **B.** Average  
14 egg-laying rate of RILs partitioned and averaged by their genotype at *nurf-1* and one of the  
15 modifier QTLs at five time points. The modifier QTL genotype is indicated on the x-axis. The  
16 *nurf-1* genotype is indicated by the color of the lines. Non-white background coloring indicates a  
17 significant effect of the modifier QTL by ANOVA ( $p < 0.05$ ). Yellow background indicates a  
18 significant effect of the modifier QTL but no significant non-linear interaction with *nurf-1* by  
19 ANOVA ( $p < 0.05$ ). Green background indicates a significant effect of the modifier QTL and a  
20 significant positive non-linear interaction with *nurf-1* by ANOVA ( $p < 0.05$ ). Red background  
21 indicates a significant effect of the modifier QTL and a significant negative non-linear interaction  
22 with *nurf-1* by ANOVA ( $p < 0.05$ ).

23 **Figure 6.** QTL mapping of parameters estimated for each RIL strain. **A and B.** A least-squares  
24 method was used to fit individual  $k_0$  and  $S_0$  values for all 94 RIL strains. **Left panel:** Histogram  
25 of all  $k_0$  and  $S_0$  values from 94 RIL strains. **Middle panel:** QTL mapping of the  $k_0$  and  $S_0$   
26 parameters. Black line indicates a one dimensional scan. We also used the *nurf-1* genotype as  
27 an additive (blue) or interactive (red) covariate. Black stars indicate QTLs with genome-wide  
28 significance above 0.05. **Right panel:** RIL strains segregated by their genotypes at the *nurf-1*  
29 locus (panel **A**) or their genotypes at the *nurf-1* and QTL<sub>v</sub> loci (panel **B**). **C.** Schematic of NIL  
30 strains used for panel **D**. **D.** Total fecundity (# of eggs laid over the animal's lifespan) of NIL  
31 strains and parental strains indicated on the x-axis.

## 32 METHODS

### 33 Strains



- 1 Strains were cultivated on agar plates seeded with *E. coli* strain OP50 at 20°C (44).
- 2 Strains used in this study are: N2, LSJ2, CX12311 *kyIR1(V, CB4856>N2)*; *qgIR1(X,*  
3 *CB4856>N2)*.
- 4 NIL strains used for this study are: PTM66 (*NIL<sub>nurf-1</sub>*) *kyIR87(II, LSJ2>N2)*; *kyIR1(V,*  
5 *CB4856>N2)*; *qgIR1(X, CB4856>N2)*, PTM75 (*NIL<sub>v</sub>*) *kahIR2 (V,LSJ2>N2)*, *kyIR1 (V,*  
6 *CB4856>N2)*; *qgIR1(X, CB4856>N2)*, PTM84 (*NIL<sub>nurf-1, v</sub>*) *kahIR6(IV,LSJ2>N2)*; *kyIR87(II,*  
7 *LSJ2>N2)*; *kyIR1(V, CB4856>N2)*; *qgIR1(X, CB4856>N2)*
- 8 RIL strains used in this study are sequentially: CX12312 – CX12327, CX12346 – CX12377,  
9 CX12381 – CX12388, CX12414 – CX12437, and CX12495-CX12510

## 10 **Egg-laying assays**

- 11 Egg-laying assays were performed as previously described (24).
- 12 For mating experiments in **figure 2E**, twelve N2 or CX12311 males were placed on  
13 experimental plates with six L4 hermaphrodites of interest for the first time point and mated  
14 hermaphrodites were then transferred to experimental plates without males. Successful mating  
15 events were validated via the observation of males in the F1 generation of mating plates.

## 16 **Immunofluorescence and Microscopy**

- 17 Gonad immunofluorescence was performed on adult animals from each strain 24 and 48 hours  
18 after the L4 larval stage. Gonads were dissected in M9 containing 1% Tween and 1 mM  
19 levamisole and fixed in 2% paraformaldehyde via freeze cracking. Fixed gonads were stained  
20 with a 1:50 conjugated H3KS10p Alexa Fluor 488 antibody (Millipore Cat. 06-570-AF488)  
21 specific to mitotically dividing cells and 1.5 mg/mL of DAPI in Vectashield mounting medium  
22 (Vector Laboratories Cat. H-1200) (32, 33). Mitotic germline cells and germline stem cells were  
23 imaged and scored between the transition zone and the distal tip on an Olympus IX73 inverted  
24 microscope with 100x/1.40 UPlanSApo objective (Olympus) and a Hamamatsu Orca-flash4.0  
25 digital camera. The distal tip cell (**Figure 2A**) is located at the tip of the gonad and releases a  
26 factor that promotes mitosis. The transition zone represents the location in the gonad where  
27 cells are beginning to undergo meiosis.

- 28 Embryo/oocytes/sperm/germline stem cells were quantified by fixing whole animals in 95%  
29 ethanol and staining nuclei with 1.5 mg/mL DAPI contained in Vectashield mounting medium.  
30 Embryos were scored using DIC on a 10x/0.30 UPlanFL N objective (Olympus). DAPI stained  
31 oocytes were imaged and scored between the spermatheca and posterior gonadal arm with a

1 40x/1.3 PlanApo objective (Olympus). Sperm and germline stem cells were identified using z-  
2 stack to capture multiple planes within each spermatheca or progenitor zone respectively. The  
3 transition zone was identified using morphological criteria based upon the crescent shape of the  
4 nucleus. All images and scoring were processed in ImageJ.

## 5 **Statistics**

6 Significant differences between means were determined using a Mann-Whitney U test, a  
7 nonparametric test of the null hypothesis. For simplicity, a Bonferroni correction was used to  
8 modify the type I error rate to account for multiple testing. For each figure, we have listed the  
9 uncorrected p-value and the number of comparisons used for the Bonferroni correction in  
10 Supplemental Table 1. Both the non-parametric test and the Bonferroni correction should be  
11 conservative approximations of the true p-value. For the analysis of epistasis in Figure 5, we  
12 used ANOVA to calculate a F value and associated p-value using the fitqtl function in R/qtl. We  
13 calculated a single position for each of the five modifier QTLs to use for all five time points. All  
14 significant QTLs were simultaneously fit together for each of the five timepoints considering both  
15 their linear effect and their interaction with the *nurf-1* genotype (i.e.  $y = QI + QII + Qnurf + QIV +$   
16  $QV + QX + QI*Qnurf + QII*Qnurf + QIV*Qnurf + QV*Qnurf + QX*Qnurf$ ). The F value was  
17 calculated by dropping a single QTL at a time. Since most of the parameters were significant  
18 before multiple comparison testing, we used the Benjamini-Hochberg procedure to control for  
19 the false discovery rate.

## 20 **QTL Mapping**

21 R/qtl was used to perform a one-dimensional scan using marker regression on the 192 markers  
22 (38). The significance threshold ( $p = 0.05$ ) was determined using 1000 permutation tests. To  
23 identify modifier QTLs, the *nurf-1* marker was used as an additive and interactive covariate for  
24 additional one-dimensional scans, assuming a normal model. The significance threshold ( $p =$   
25  $0.05$ ) for these two tests was determined using 1000 permutation tests.

## 26 **Egg-laying model**

27 We adapted a previously published model (37), which simulates the egg-laying rate using the  
28 following set of equations:

$$\dot{E} = k_f OS$$

$$\dot{O} = k_o - \dot{E}$$

$$\dot{S} = -\dot{E}$$

1 where  $E$  is fertilized eggs,  $O$  is oocytes,  $S$  is sperm,  $k_f$  is the rate of oocyte fertilization,  $k_o$  is the  
 2 rate of ovulation, and  $k_c$  is the carrying capacity of the uterus. A dot indicates a time-derivative.  
 3 We solved these ODEs numerically using a Dormand-Prince explicit solver or using an  
 4 analytical solution (below). To calculate best fits, we assumed that the LSJ2, CX12311, RILs  
 5 and NIL<sub>nurf-1</sub> strains had unique values of  $k_o$ , but shared the  $k_f$  parameters. These parameters  
 6 were estimated using a Levenberg-Marquardt non-linear least squares algorithm. To calculate  
 7 effect-size, we subtracted the two fits.

8 We used Mathematica to analytically solve the ODE equations:

9

$$S = \frac{e^{-k_f * (k_o \frac{t^2}{2} - S_0 t)}}{C_2 + \sqrt{\frac{\pi k_f}{2 k_o}} * e^{\frac{k_f * S_0^2}{2 k_o}} * \operatorname{erf}\left(\sqrt{\frac{2 k_f}{k_o}} * k_o t - S_0\right)}$$

$$O = k_o t - S_0 + \frac{e^{-k_f * (k_o \frac{t^2}{2} - S_0 t)}}{C_2 + \sqrt{\frac{\pi k_f}{2 k_o}} * e^{\frac{k_f * S_0^2}{2 k_o}} * \operatorname{erf}\left(\sqrt{\frac{2 k_f}{k_o}} * k_o t - S_0\right)}$$

$$C_2 = \frac{1}{S_0} - \sqrt{\frac{\pi k_f}{2 k_o}} * S_0^2 e^{\frac{k_f}{2 k_o}} \operatorname{erf}\left(-S_0 * \sqrt{\frac{k_f}{2 k_o}}\right)$$

10 We used these equations to estimate the parameters using a Levenberg-Marquardt non-linear  
 11 least squares algorithm.

## 12 NIL strains

13 NILs were generated from previously existing RILs by backcrossing the chromosomal region of  
 14 interest into a balancer strain containing a CX12311 background along with a fluorescent  
 15 miniMos insertion near the QTL of interest. For ten generations, males that were heterozygous  
 16 for the fluorescent marker (as determined by fluorescence intensity) were crossed to  
 17 hermaphrodites of the balancer strain. On the 11<sup>th</sup> generation, animals without the fluorescent  
 18 marker were isolated. Genotyping of one to three markers within the candidate regions was  
 19 used to confirm the successful introgression of LSJ2 DNA into CX12311. For each NIL strain,  
 20 the starting RIL strain and the minMos balancer are listed in the table below:

| NIL strain | RIL strain | miniMos Balancer |
|------------|------------|------------------|
|------------|------------|------------------|

|       |         |                                                         |
|-------|---------|---------------------------------------------------------|
| PTM66 | CX13248 | None; followed LSJ2 allele using PvuII-based genotyping |
| PTM75 | CX12361 | oxTi710                                                 |

1

2

### 3 REFERENCES

- 4 1. Wei WH, Hemani G, Haley CS. Detecting epistasis in human complex traits. *Nat Rev*  
5 *Genet.* 2014;15(11):722-33.
- 6 2. Phillips PC. The language of gene interaction. *Genetics.* 1998;149(3):1167-71.
- 7 3. Moore JH, Williams SM. Traversing the conceptual divide between biological and  
8 statistical epistasis: systems biology and a more modern synthesis. *Bioessays.*  
9 2005;27(6):637-46.
- 10 4. Phillips PC. Epistasis--the essential role of gene interactions in the structure and  
11 evolution of genetic systems. *Nat Rev Genet.* 2008;9(11):855-67.
- 12 5. Brem RB, Storey JD, Whittle J, Kruglyak L. Genetic interactions between  
13 polymorphisms that affect gene expression in yeast. *Nature.* 2005;436(7051):701-3.
- 14 6. Deutschbauer AM, Davis RW. Quantitative trait loci mapped to single-nucleotide  
15 resolution in yeast. *Nature genetics.* 2005;37(12):1333-40.
- 16 7. Gerke J, Lorenz K, Cohen B. Genetic interactions between transcription factors cause  
17 natural variation in yeast. *Science.* 2009;323(5913):498-501.
- 18 8. Doebley J, Stec A, Gustus C. teosinte branched1 and the origin of maize: evidence for  
19 epistasis and the evolution of dominance. *Genetics.* 1995;141(1):333-46.
- 20 9. Kroymann J, Mitchell-Olds T. Epistasis and balanced polymorphism influencing  
21 complex trait variation. *Nature.* 2005;435(7038):95-8.
- 22 10. Rowe HC, Hansen BG, Halkier BA, Kliebenstein DJ. Biochemical networks and  
23 epistasis shape the Arabidopsis thaliana metabolome. *The Plant cell.* 2008;20(5):1199-216.
- 24 11. Wentzell AM, Rowe HC, Hansen BG, Ticconi C, Halkier BA, Kliebenstein DJ. Linking  
25 metabolic QTLs with network and cis-eQTLs controlling biosynthetic pathways. *PLoS*  
26 *genetics.* 2007;3(9):1687-701.
- 27 12. Huang W, Richards S, Carbone MA, Zhu D, Anholt RR, Ayroles JF, et al. Epistasis  
28 dominates the genetic architecture of Drosophila quantitative traits. *Proceedings of the*  
29 *National Academy of Sciences of the United States of America.* 2012;109(39):15553-9.
- 30 13. Mackay TF, Stone EA, Ayroles JF. The genetics of quantitative traits: challenges and  
31 prospects. *Nature reviews Genetics.* 2009;10(8):565-77.
- 32 14. Gaertner BE, Parmenter MD, Rockman MV, Kruglyak L, Phillips PC. More than the  
33 sum of its parts: a complex epistatic network underlies natural variation in thermal  
34 preference behavior in *Caenorhabditis elegans*. *Genetics.* 2012;192(4):1533-42.
- 35 15. Glater EE, Rockman MV, Bargmann CI. Multigenic natural variation underlies  
36 *Caenorhabditis elegans* olfactory preference for the bacterial pathogen *Serratia*  
37 *marcescens*. *G3.* 2014;4(2):265-76.
- 38 16. Carlborg O, Jacobsson L, Ahgren P, Siegel P, Andersson L. Epistasis and the release of  
39 genetic variation during long-term selection. *Nature genetics.* 2006;38(4):418-20.

- 1 17. Pettersson M, Besnier F, Siegel PB, Carlborg O. Replication and explorations of high-  
2 order epistasis using a large advanced intercross line pedigree. *PLoS genetics*.  
3 2011;7(7):e1002180.
- 4 18. Cheverud JM, Vaughn TT, Pletscher LS, Peripato AC, Adams ES, Erikson CF, et al.  
5 Genetic architecture of adiposity in the cross of LG/J and SM/J inbred mice. *Mammalian*  
6 *genome : official journal of the International Mammalian Genome Society*. 2001;12(1):3-12.
- 7 19. Jarvis JP, Cheverud JM. Mapping the epistatic network underlying murine  
8 reproductive fatpad variation. *Genetics*. 2011;187(2):597-610.
- 9 20. Leamy LJ, Gordon RR, Pomp D. Sex-, diet-, and cancer-dependent epistatic effects on  
10 complex traits in mice. *Frontiers in genetics*. 2011;2:71.
- 11 21. Peripato AC, De Brito RA, Matioli SR, Pletscher LS, Vaughn TT, Cheverud JM.  
12 Epistasis affecting litter size in mice. *Journal of evolutionary biology*. 2004;17(3):593-602.
- 13 22. Francesconi M, Lehner B. The effects of genetic variation on gene expression  
14 dynamics during development. *Nature*. 2014;505(7482):208-11.
- 15 23. Cordell HJ. Detecting gene-gene interactions that underlie human diseases. *Nature*  
16 *reviews Genetics*. 2009;10(6):392-404.
- 17 24. Mackay TF. Epistasis and quantitative traits: using model organisms to study gene-  
18 gene interactions. *Nature reviews Genetics*. 2014;15(1):22-33.
- 19 25. McGrath PT, Rockman MV, Zimmer M, Jang H, Macosko EZ, Kruglyak L, et al.  
20 Quantitative mapping of a digenic behavioral trait implicates globin variation in *C. elegans*  
21 sensory behaviors. *Neuron*. 2009;61(5):692-9.
- 22 26. McGrath PT, Xu Y, Ailion M, Garrison JL, Butcher RA, Bargmann CI. Parallel evolution  
23 of domesticated *Caenorhabditis* species targets pheromone receptor genes. *Nature*.  
24 2011;477(7364):321-5.
- 25 27. de Bono M, Bargmann CI. Natural variation in a neuropeptide Y receptor homolog  
26 modifies social behavior and food response in *C. elegans*. *Cell*. 1998;94(5):679-89.
- 27 28. Persson A, Gross E, Laurent P, Busch KE, Bretes H, de Bono M. Natural variation in a  
28 neural globin tunes oxygen sensing in wild *Caenorhabditis elegans*. *Nature*.  
29 2009;458(7241):1030-3.
- 30 29. Large EE, Xu W, Zhao Y, Brady SC, Long L, Butcher RA, et al. Selection on a Subunit of  
31 the NURF Chromatin Remodeler Modifies Life History Traits in a Domesticated Strain of  
32 *Caenorhabditis elegans*. *PLoS Genet*. 2016;12(7):e1006219.
- 33 30. Duveau F, Felix MA. Role of pleiotropy in the evolution of a cryptic developmental  
34 variation in *Caenorhabditis elegans*. *PLoS biology*. 2012;10(1):e1001230.
- 35 31. Dalfo D, Michaelson D, Hubbard EJ. Sensory regulation of the *C. elegans* germline  
36 through TGF-beta-dependent signaling in the niche. *Curr Biol*. 2012;22(8):712-9.
- 37 32. Hendzel MJ, Wei Y, Mancini MA, Van Hooser A, Ranalli T, Brinkley BR, et al. Mitosis-  
38 specific phosphorylation of histone H3 initiates primarily within pericentromeric  
39 heterochromatin during G2 and spreads in an ordered fashion coincident with mitotic  
40 chromosome condensation. *Chromosoma*. 1997;106(6):348-60.
- 41 33. Kalchauer I, Farley BM, Pauli S, Ryder SP, Ciosk R. FBF represses the Cip/Kip cell-  
42 cycle inhibitor CKI-2 to promote self-renewal of germline stem cells in *C. elegans*. *EMBO J*.  
43 2011;30(18):3823-9.
- 44 34. Schafer WF. Genetics of egg-laying in worms. *Annual review of genetics*.  
45 2006;40:487-509.

- 1 35. Miller MA, Nguyen VQ, Lee MH, Kosinski M, Schedl T, Caprioli RM, et al. A sperm  
2 cytoskeletal protein that signals oocyte meiotic maturation and ovulation. *Science*.  
3 2001;291(5511):2144-7.
- 4 36. Miller MA, Ruest PJ, Kosinski M, Hanks SK, Greenstein D. An Eph receptor sperm-  
5 sensing control mechanism for oocyte meiotic maturation in *Caenorhabditis elegans*. *Genes*  
6 & development. 2003;17(2):187-200.
- 7 37. McMullen PD, Aprison EZ, Winter PB, Amaral LA, Morimoto RI, Ruvinsky I. Macro-  
8 level modeling of the response of *C. elegans* reproduction to chronic heat stress. *PLoS*  
9 computational biology. 2012;8(1):e1002338.
- 10 38. Broman KW, Wu H, Sen S, Churchill GA. R/qtl: QTL mapping in experimental crosses.  
11 *Bioinformatics*. 2003;19(7):889-90.
- 12 39. Hemani G, Shakhbazov K, Westra HJ, Esko T, Henders AK, McRae AF, et al. Detection  
13 and replication of epistasis influencing transcription in humans. *Nature*.  
14 2014;508(7495):249-53.
- 15 40. Gertz J, Gerke JP, Cohen BA. Epistasis in a quantitative trait captured by a molecular  
16 model of transcription factor interactions. *Theor Popul Biol*. 2010;77(1):1-5.
- 17 41. Harms MJ, Thornton JW. Evolutionary biochemistry: revealing the historical and  
18 physical causes of protein properties. *Nature reviews Genetics*. 2013;14(8):559-71.
- 19 42. Lehner B. Molecular mechanisms of epistasis within and between genes. *Trends in*  
20 *genetics : TIG*. 2011;27(8):323-31.
- 21 43. Greene JS, Dobosiewicz M, Butcher RA, McGrath PT, Bargmann CI. Regulatory  
22 changes in two chemoreceptor genes contribute to a *Caenorhabditis elegans* QTL for  
23 foraging behavior. *Elife*. 2016;5.
- 24 44. Brenner S. The genetics of *Caenorhabditis elegans*. *Genetics*. 1974;77(1):71-94.  
25

## Figure 1

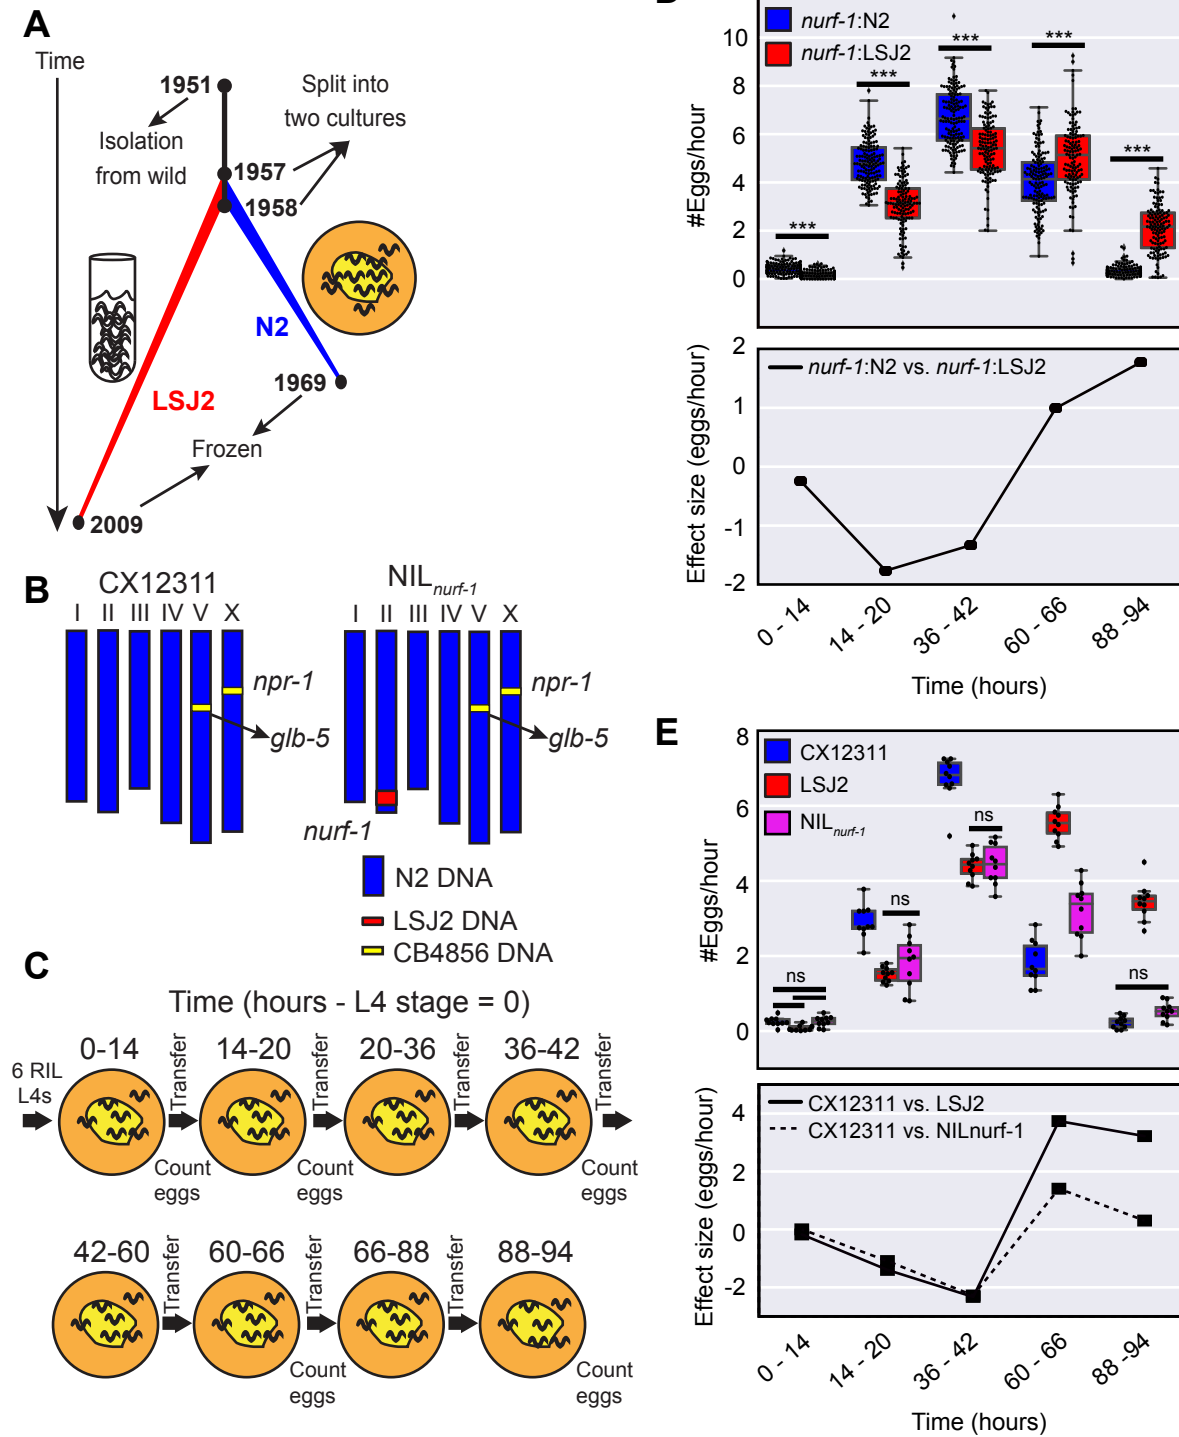

## Figure 2

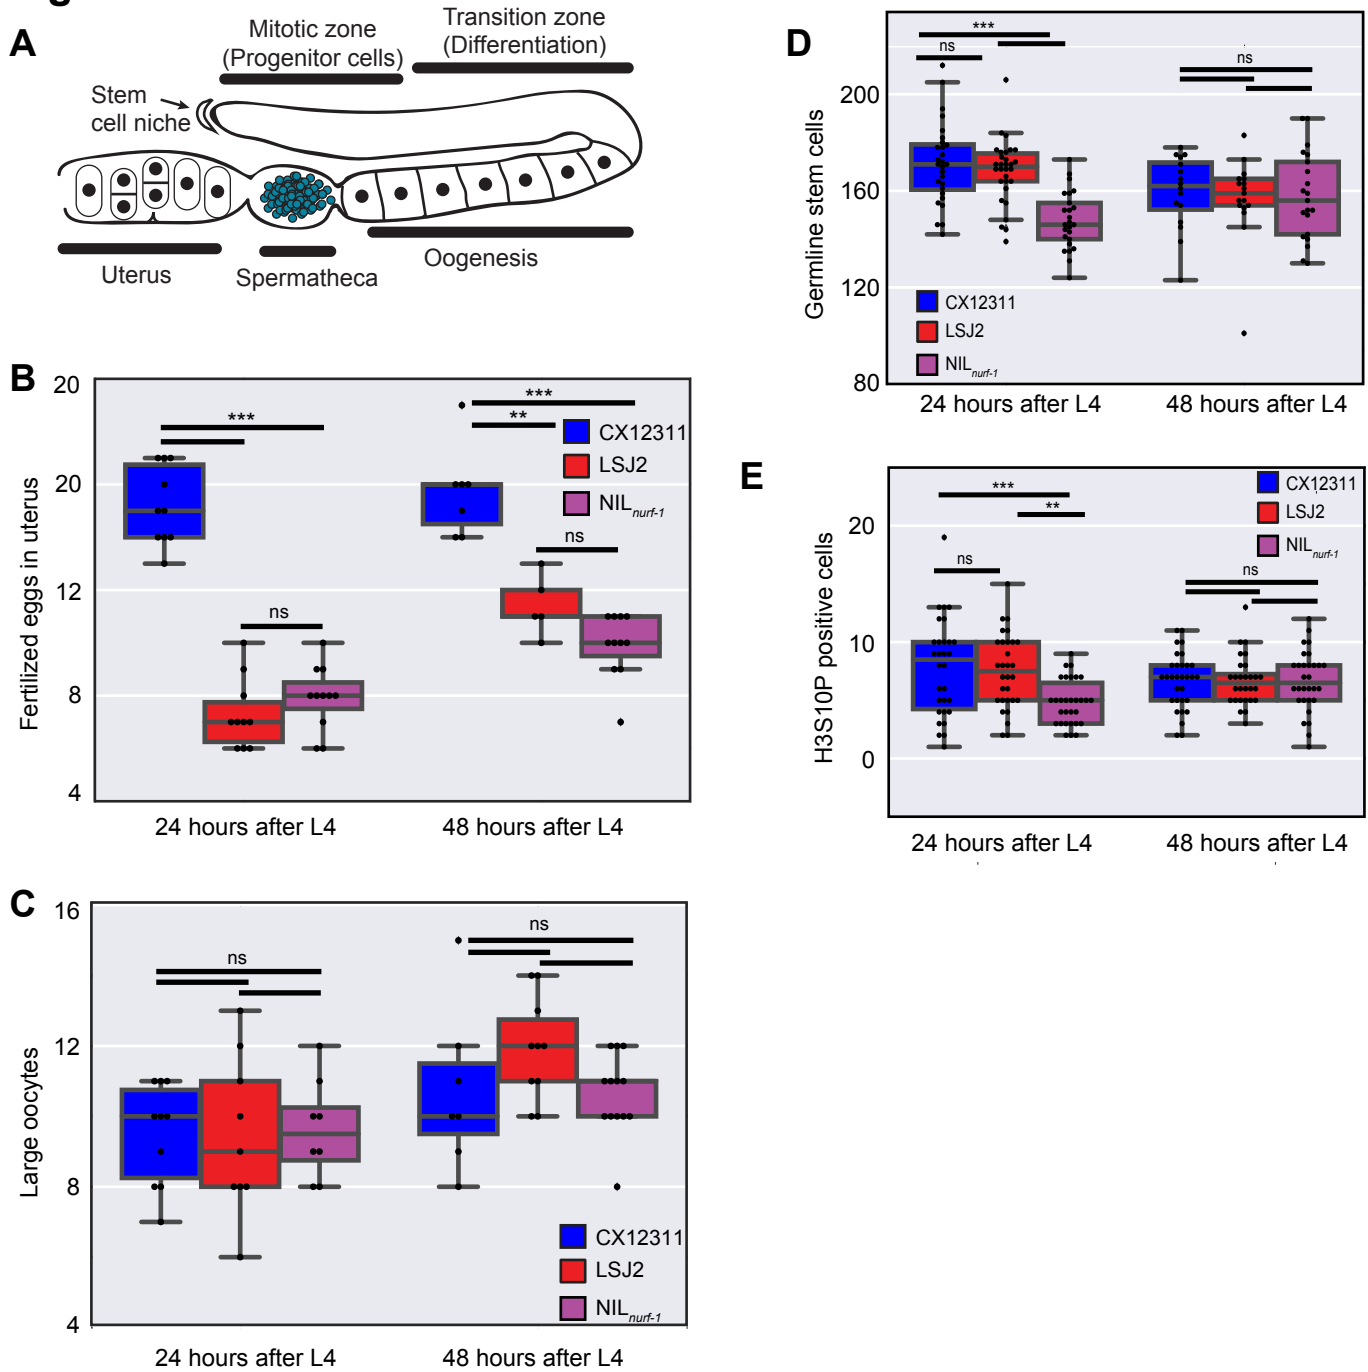



## Figure 3

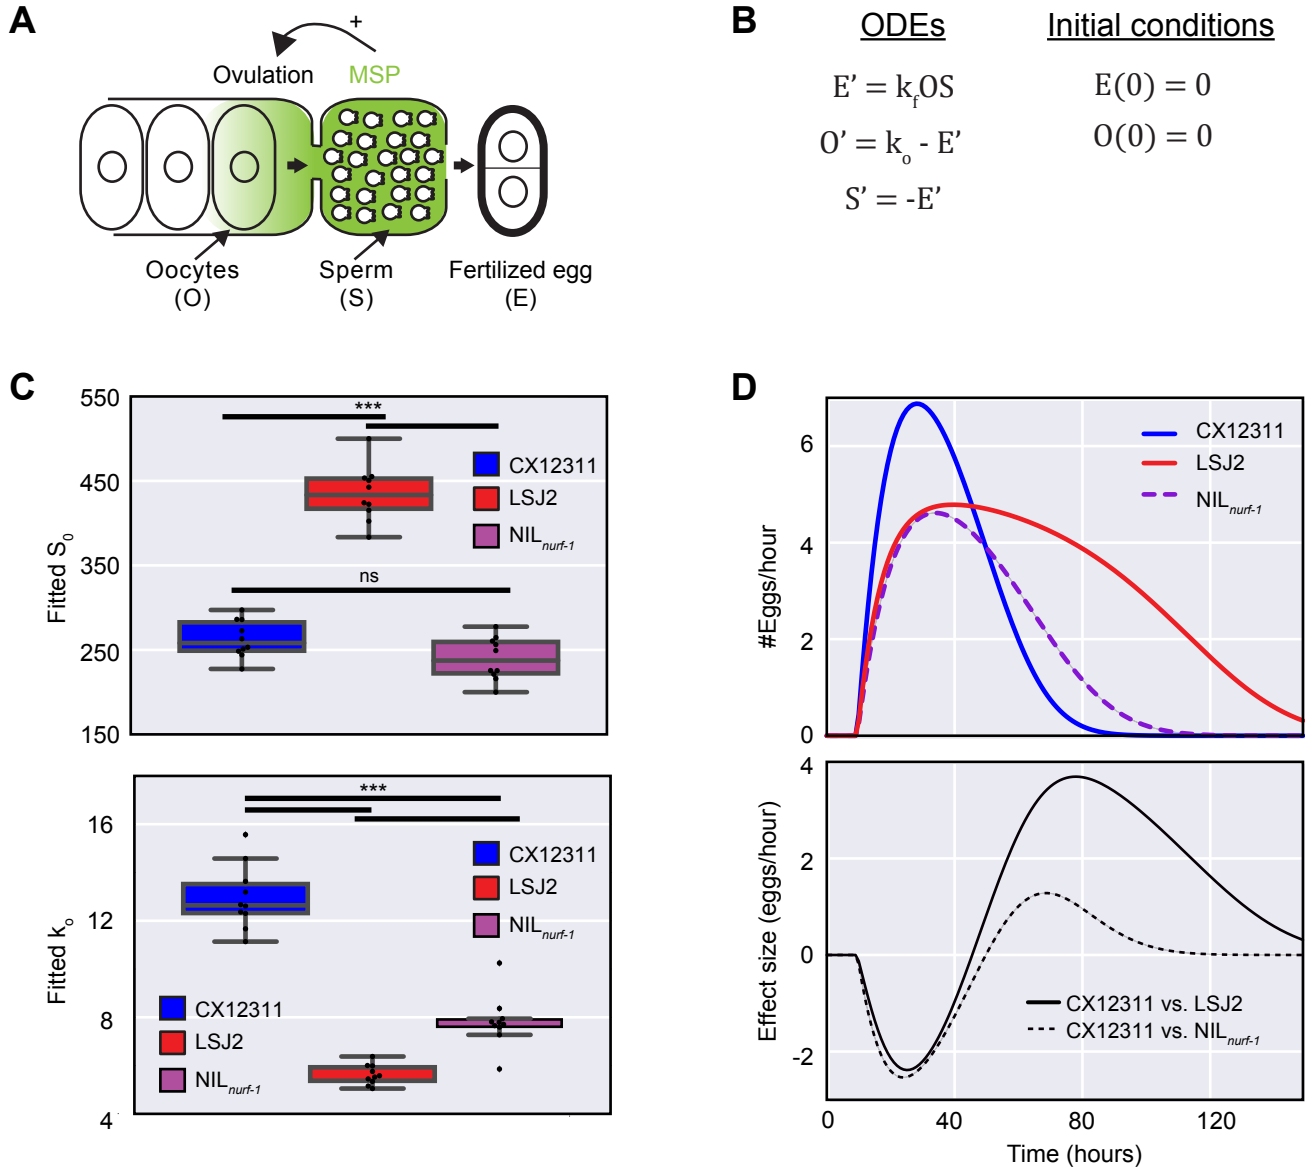

## Figure 4

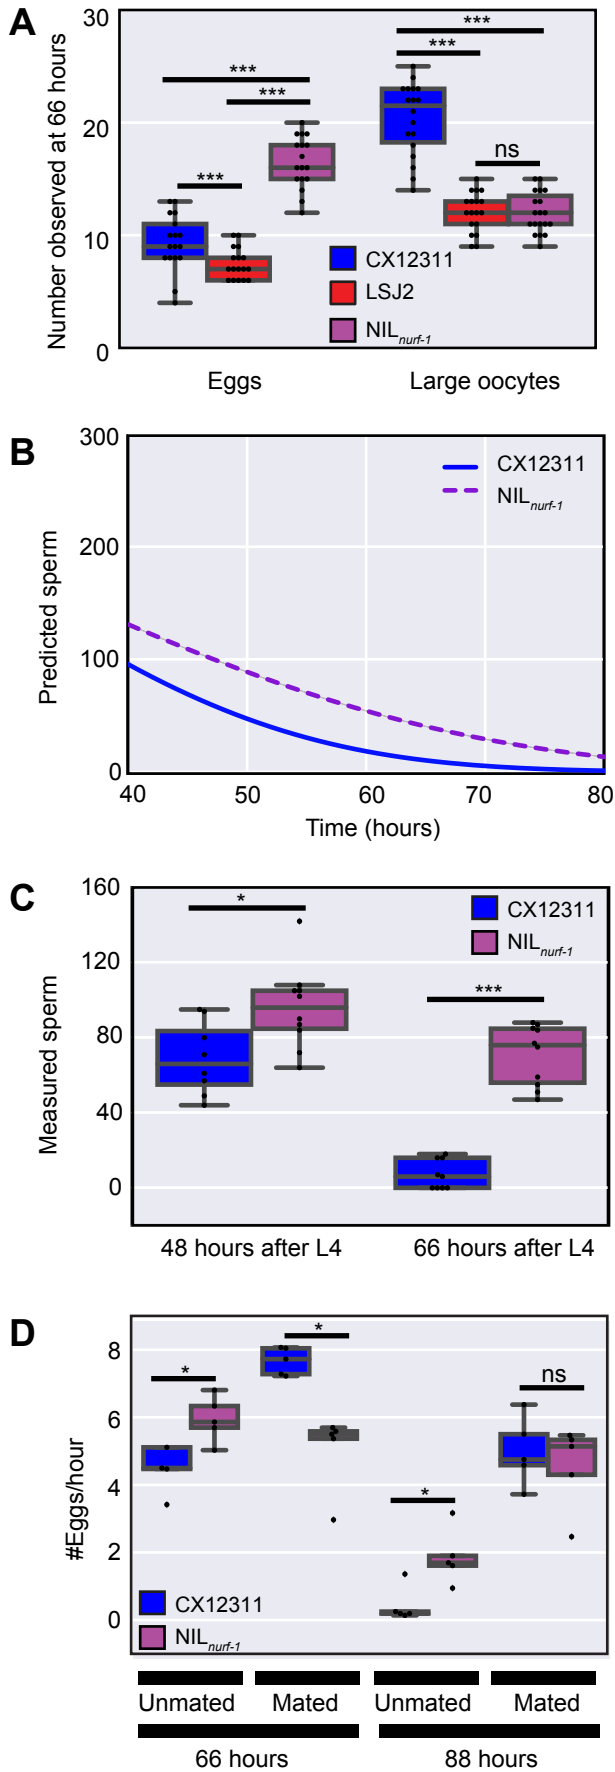

## Figure 5

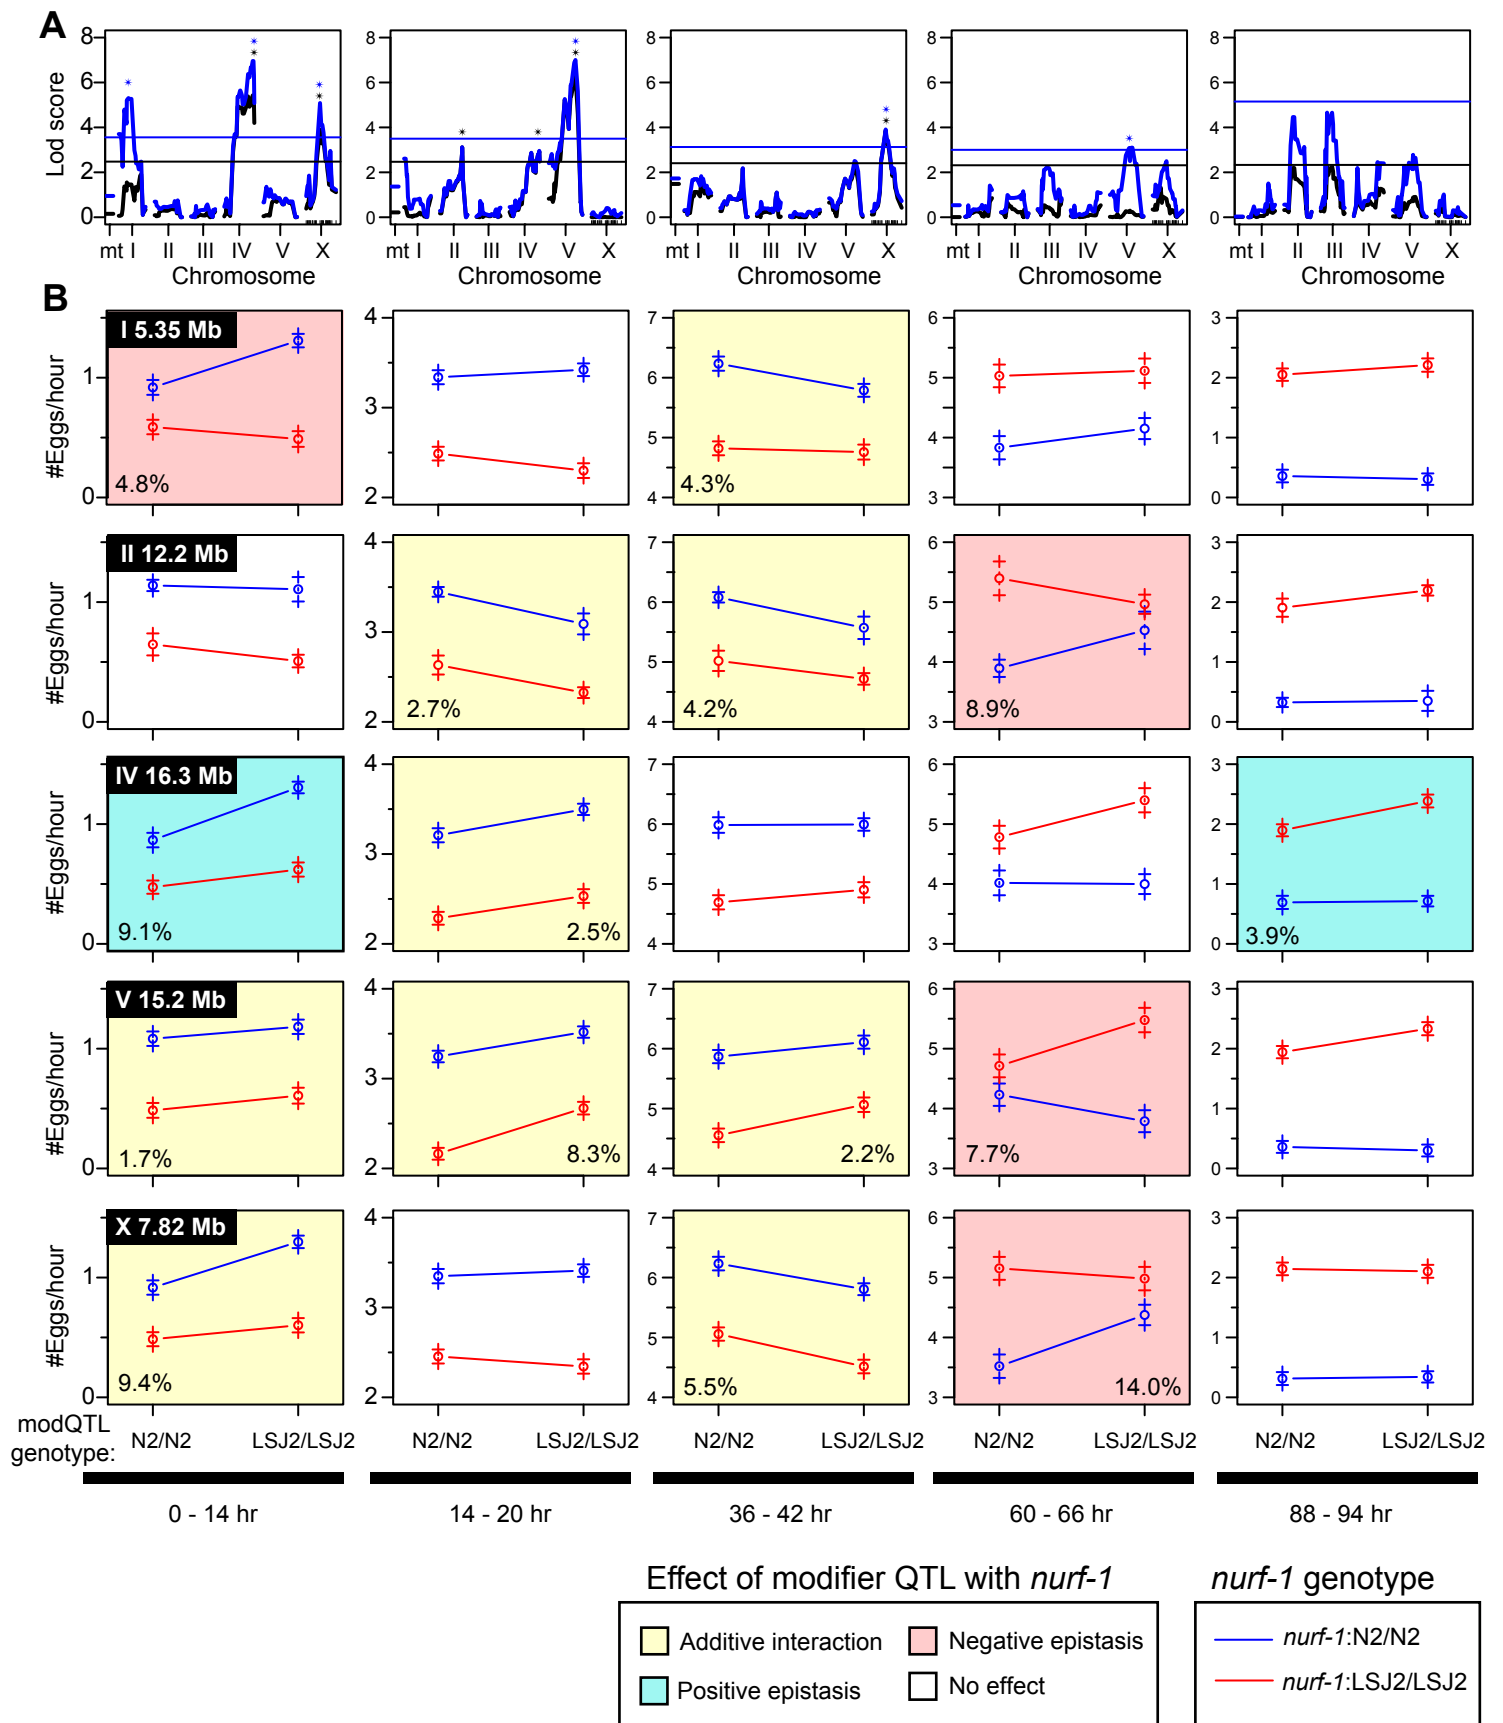

## Figure 6

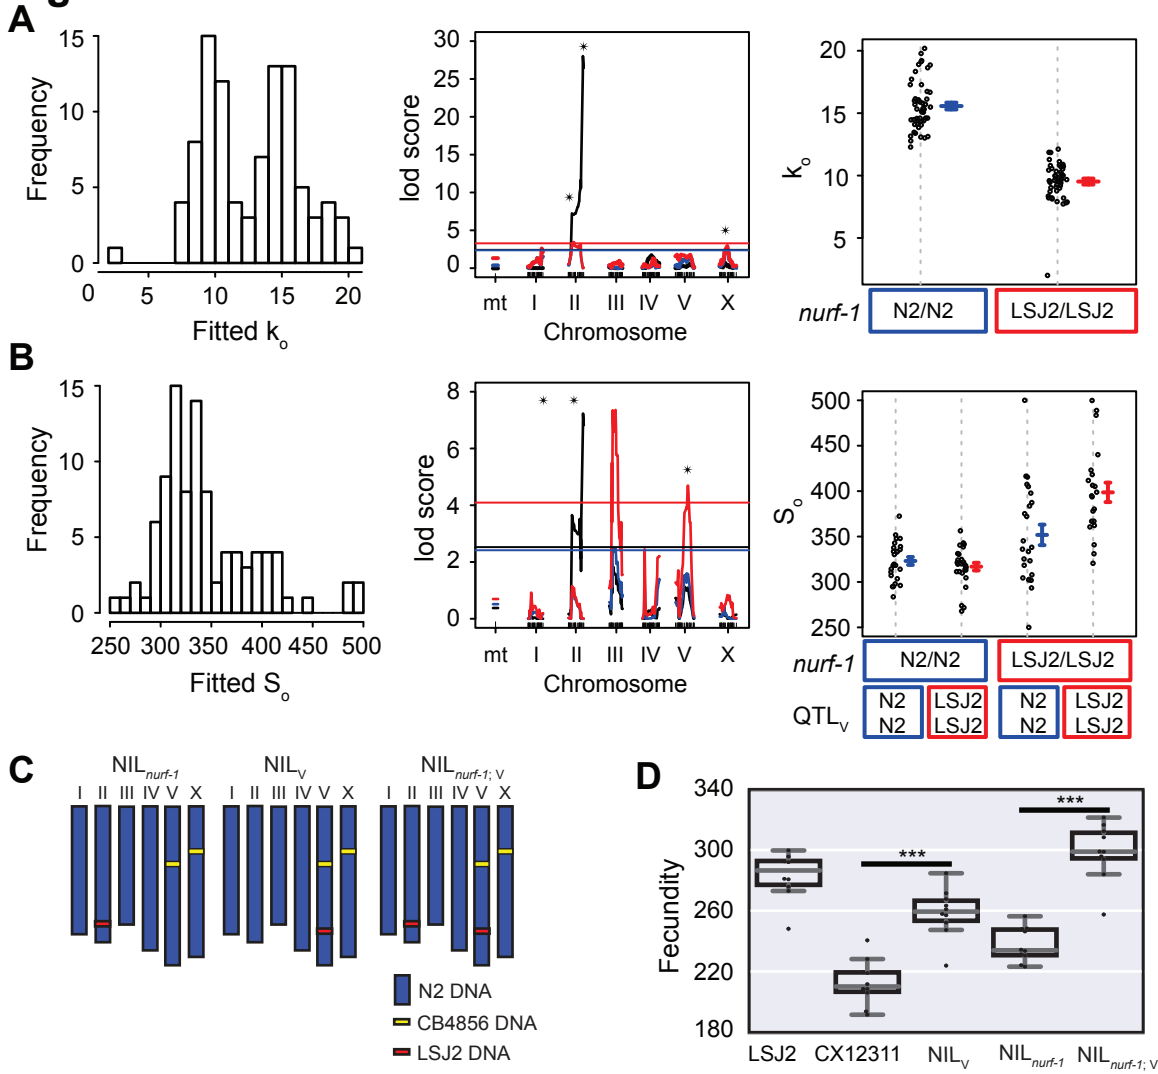

Source: https://www.biorxiv.org/content/10.1101/114348v1.full.pdf
